# Supplementary material for: Relationship between CDH23 gene and risk of noise-induced hearing loss
Source: Research Square preprint supplement (doi:10.21203/rs.3.rs-276861/v1), 2021-03-16
Supplement: Supplementary file 1 [file f96627f77c2fadd3b3428334.xlsx]

## Sheet: Sheet2
Table S1 Association between SNPs of CDH23 and NIHL risk
rsnumber/model		Overall								noise exposure level﹤85 dB(A)								noise exposure level≥85 dB(A)								CNE﹤97dB(A)﹒year								CNE≥97dB(A)﹒year
		Period Ⅰ				Period Ⅰ+Ⅱ				Period Ⅰ				Period Ⅰ+Ⅱ				Period Ⅰ				Period Ⅰ+Ⅱ				Period Ⅰ				Period Ⅰ+Ⅱ				Period Ⅰ				Period Ⅰ+Ⅱ
		co	ca	OR(95%CI)		co	ca	OR(95%CI)		co	ca	OR(95%CI)		co	ca	OR(95%CI)		co	ca	OR(95%CI)		co	ca	OR(95%CI)		co	ca	OR(95%CI)		co	ca	OR(95%CI)		co	ca	OR(95%CI)		co	ca	OR(95%CI)
CDH23_rs1227049
additive model	GG/GC/CC	227/225/40	142/123/21	0.90(0.71, 1.14)		/				90/101/15	50/55/10	1.02(0.70, 1.48)		/				137/124/25	92/68/11	0.81(0.60, 1.10)		/				112/95/22	61/59/13	1.07(0.77, 1.49)		/				115/130/8	81/64/8	0.74(0.53, 1.05)		/
co-dominant model	GG	227	142	1						90	50	1						137	92	1						112	61	1						115	81	1
	GC	225	123	0.86(0.63, 1.18)						101	55	0.93(0.57, 1.53)						124	68	0.80(0.54, 1.20)						95	59	1.13(0.71, 1.78)						130	64	0.70(0.46, 1.08)
	CC	40	21	0.86(0.48, 1.52)						15	10	1.17(0.48, 2.84)						25	11	0.67(0.31, 1.43)						22	13	1.09(0.51, 2.32)						18	8	0.63(0.26, 1.55)
dominant model	GG	227	142	1						90	50	1						137	92	1						112	61	1						115	81	1
	CC+GC	265	144	0.86(0.64, 1.16)						116	65	0.97(0.60, 1.55)						149	79	0.78(0.53, 1.15)						117	72	1.12(0.73, 1.73)						148	72	0.69(0.46, 1.05)
recessive model	GG+GC	452	265	1						191	105	1						261	160	1						207	120	1						245	145	1
	CC	40	21	0.92(0.53, 1.60)						15	10	1.21(0.52, 2.84)						25	11	0.73(0.35, 1.54)						22	13	1.03(0.50, 2.13)						18	8	0.74(0.31, 1.79)
CDH23_rs10999947								1								1								1								1								1
additive model	GG/GA/AA	235/210/45	129/133/22	1.03(0.82, 1.30)		342/314/63	173/187/32	1.08(0.89, 1.31)		102/85/19	57/50/7	0.93(0.64, 1.35)		150/131/28	83/68/11	0.87(0.64, 1.18)		133/125/26	72/83/15	1.10(0.81, 1.48)		192/183/35	90/119/21	1.24(0.96, 1.60)		107/95/27	62/63/7	0.86(0.61, 1.21)		155/141/34	79/83/13	0.98(0.73, 1.30)		128/115/18	67/70/15	1.21(0.88, 1.68)		187/173/29	94/104/19	1.16(0.89, 1.51)
co-dominant model	GG	235	129	1		342	173	1		102	57	1		150	83	1		133	72	1		192	90	1		107	62	1		155	79	1		128	67	1		187	94	1
	GA	210	133	1.16(0.85, 1.58)		314	187	1.19(0.92, 1.55)		85	50	1.06(0.65, 1.73)		131	68	0.91(0.61, 1.37)		125	83	1.22(0.81, 1.83)		183	119	1.43(1.01, 2.01)		95	63	1.18(0.75, 1.85)		141	83	1.17(0.80, 1.72)		115	70	1.14(0.74, 1.75)		173	104	1.20(0.85, 1.71)
	AA	45	22	0.89(0.51, 1.55)		63	32	1.00(0.63, 1.59)		19	7	0.69(0.27, 1.78)		28	11	0.70(0.33, 1.49)		26	15	1.04(0.51, 2.11)		35	21	1.29(0.71, 2.34)		27	7	0.45(0.18, 1.10)		34	13	0.74(0.37, 1.49)		18	15	1.61(0.74, 3.48)		29	19	1.27(0.67, 2.40)
dominant model	GG	235	129	1		342	173	1		102	57	1		150	83	1		133	72	1		192	90	1		107	62	1		155	79	1		128	67	1		187	94	1
	GA+AA	255	155	1.11(0.83, 1.50)		377	219	1.16(0.90, 1.49)		104	57	0.99(0.62, 1.59)		159	79	0.88(0.59, 1.29)		151	98	1.19(0.81, 1.75)		218	140	1.40(1.01, 1.95)		122	70	1.01(0.65, 1.57)		175	96	1.09(0.75, 1.57)		133	85	1.20(0.80, 1.81)		202	123	1.21(0.87, 1.70)
recessive model	GA+GG	445	262	1		656	360	1		187	107	1		281	151	1		258	155	1		375	209	1		202	125	1		296	162	1		243	137	1		360	198	1
	AA	45	22	0.82(0.48, 1.41)		63	32	0.92(0.59, 1.43)		19	7	0.68(0.27, 1.68)		28	11	0.73(0.35, 1.52)		26	15	0.94(0.48, 1.85)		35	21	1.07(0.60, 1.89)		27	7	0.42(0.18, 0.99)		34	13	0.68(0.35, 1.34)		18	15	1.51(0.72, 3.18)		29	19	1.15(0.63, 2.13)
CDH23_rs10999978								1								1								1								1								1
additive model	CC/CT/TT	344/131/12	187/90/5	1.15(0.87, 1.53)		499/198/19	266/117/7	1.01(0.80, 1.29)		145/55/5	80/32/3	0.99(0.63, 1.56)		216/84/8	113/46/4	0.97(0.67, 1.42)		199/76/7	107/58/2	1.25(0.86, 1.81)		283/114/11	153/71/3	1.02(0.75, 1.40)		171/49/7	90/39/3	1.24(0.82, 1.88)		241/78/9	122/50/3	1.10(0.76, 1.57)		173/82/5	97/51/2	1.08(0.72, 1.61)		258/120/10	144/67/4	0.95(0.69, 1.31)
co-dominant model	CC	344	187	1		499	266	1		145	80	1		216	113	1		199	107	1		283	153	1		171	90	1		241	122	1		173	97	1		258	144	1
	CT	131	90	1.30(0.94, 1.81)		198	117	1.10(0.84, 1.45)		55	32	0.99(0.58, 1.69)		84	46	0.99(0.64, 1.53)		76	58	1.52(1.00, 2.33)		114	71	1.18(0.82, 1.68)		49	39	1.51(0.92, 2.49)		78	50	1.27(0.83, 1.93)		82	51	1.16(0.75, 1.81)		120	67	1.00(0.70, 1.45)
	TT	12	5	0.70(0.24, 2.04)		19	7	0.65(0.27, 1.58)		5	3	0.98(0.22, 4.32)		8	4	0.89(0.26, 3.06)		7	2	0.44(0.09, 2.20)		11	3	0.46(0.12, 1.68)		7	3	0.75(0.19, 2.99)		9	3	0.61(0.16, 2.31)		5	2	0.67(0.12, 3.59)		10	4	0.66(0.20, 2.18)
dominant model	CC	344	187	1		499	266	1		145	80	1		216	113	1		199	107	1		283	153	1		171	90	1		241	122	1		173	97	1		258	144	1
	CT+TT	143	95	1.25(0.91, 1.72)		217	124	1.06(0.81, 1.39)		60	35	0.99(0.59, 1.66)		92	50	0.98(0.64, 1.50)		83	60	1.42(0.94, 2.14)		125	74	1.11(0.78, 1.57)		56	42	1.41(0.87, 2.28)		87	53	1.19(0.79, 1.80)		87	53	1.13(0.73, 1.75)		130	71	0.98(0.68, 1.40)
recessive model	CT+CC	475	277	1		697	383	1		200	112	1		300	159	1		275	165	1		397	224	1		220	129	1		319	172	1		255	148	1		378	211	1
	TT	12	5	0.65(0.22, 1.88)		19	7	0.63(0.26, 1.53)		5	3	0.987(0.227, 4.298)		8	4	0.89(0.26, 3.05)		7	2	0.39(0.08, 1.94)		11	3	0.44(0.12, 1.59)		7	3	0.67(0.17, 2.68)		9	3	0.57(0.15, 2.15)		5	2	0.63(0.12, 3.38)		10	4	0.66(0.20, 2.16)
CDH23_rs3802711								1								1								1								1								1
additive model	GG/GA/AA	327/151/10	172/98/13	1.35(1.03, 1.76)		488/209/20	247/130/14	1.22(0.97, 1.53)		124/73/7	71/38/5	0.99(0.65, 1.51)		200/98/9	108/49/5	0.95(0.66, 1.36)		203/78/3	101/60/8	1.70(1.18, 2.45)		288/111/11	139/81/9	1.44(1.07, 1.94)		144/78/7	86/40/6	0.99(0.67, 1.46)		214/104/12	115/53/7	0.99(0.71, 1.38)		183/73/3	86/58/7	1.82(1.24, 2.69)		274/105/8	132/77/7	1.48(1.08, 2.02)
co-dominant model	GG	327	172	1		488	247	1		124	71	1		200	108	1		203	101	1		288	139	1		144	86	1		214	115	1		183	86	1		274	132	1
	GA	151	98	1.21(0.88, 1.67)		209	130	1.21(0.93, 1.59)		73	38	0.86(0.52, 1.42)		98	49	0.88(0.58, 1.35)		78	60	1.55(1.02, 2.35)		111	81	1.51(1.06, 2.15)		78	40	0.87(0.54, 1.39)		104	53	0.94(0.63, 1.41)		73	58	1.63(1.04, 2.55)		105	77	1.50(1.04, 2.15)
	AA	10	13	2.71(1.15, 6.39)		20	14	1.50(0.74, 3.04)		7	5	1.58(0.47, 5.34)		9	5	1.19(0.38, 3.72)		3	8	4.93(1.26, 19.24)		11	9	1.74(0.70, 4.35)		7	6	1.52(0.49, 4.70)		12	7	1.15(0.44, 3.02)		3	7	5.88(1.43, 24.13)		8	7	2.05(0.72, 5.87)
dominant model	GG	327	172	1		488	247	1		124	71	1		200	108	1		203	101	1		288	139	1		144	86	1		214	115	1		183	86	1		274	132	1
	GA+AA	161	111	1.30(0.96, 1.77)		229	144	1.24(0.95, 1.61)		80	43	0.91(0.56, 1.48)		107	54	0.91(0.60, 1.36)		81	68	1.68(1.12, 2.52)		122	90	1.53(1.09, 2.15)		85	46	0.92(0.59, 1.44)		116	60	0.96(0.65, 1.42)		76	65	1.79(1.16, 2.76)		113	84	1.53(1.07, 2.18)
recessive model	GA+GG	478	270	1		697	377	1		197	109	1		298	157	1		281	161	1		399	220	1		222	126	1		318	168	1		256	144	1		379	209	1
	AA	10	13	2.54(1.09, 5.95)		20	14	1.41(0.70, 2.84)		7	5	1.66(0.50, 5.55)		9	5	1.24(0.40, 3.84)		3	8	4.29(1.11, 16.64)		11	9	1.53(0.62, 3.78)		7	6	1.59(0.52, 4.87)		12	7	1.17(0.45, 3.06)		3	7	5.01(1.23, 20.41)		8	7	1.80(0.63, 5.11)
CDH23_rs11592462								1								1								1								1								1
additive model	CC/CG/GG	321/159/12	186/85/15	1.09(0.84, 1.42)		474/229/18	257/114/23	1.13(0.91, 1.41)		140/63/3	78/33/4	1.03(0.66, 1.61)		208/95/6	114/42/7	0.99(0.69, 1.43)		181/96/9	108/52/11	1.11(0.80, 1.55)		266/134/12	143/72/16	1.23(0.93, 1.62)		151/75/3	87/40/6	1.14(0.76, 1.70)		224/99/7	116/52/8	1.18(0.84, 1.66)		170/84/9	99/45/9	1.06(0.74, 1.51)		250/130/11	141/62/15	1.10(0.82, 1.47)
co-dominant model	CC	321	186	1		474	257	1		140	78	1		208	114	1		181	108	1		266	143	1		151	87	1		224	116	1		170	99	1		250	141	1
	CG	159	85	0.92(0.67, 1.27)		229	114	0.92(0.70, 1.20)		63	33	0.89(0.53, 1.49)		95	42	0.79(0.51, 1.22)		96	52	0.91(0.60, 1.39)		134	72	1.00(0.70, 1.42)		75	40	0.93(0.58, 1.48)		99	52	1.03(0.69, 1.55)		84	45	0.90(0.57, 1.41)		130	62	0.83(0.57, 1.20)
	GG	12	15	2.07(0.94, 4.55)		18	23	2.40(1.26, 4.56)		3	4	2.22(0.47, 10.52)		6	7	2.39(0.77, 7.45)		9	11	2.05(0.81, 5.19)		12	16	2.53(1.16, 5.52)		3	6	3.42(0.83, 14.10)		7	8	2.26(0.79, 6.44)		9	9	1.67(0.62, 4.44)		11	15	2.46(1.09, 5.55)
dominant model	CC	321	186	1		474	257	1		140	78	1		208	114	1		181	108	1		266	143	1		151	87	1		224	116	1		170	99	1		250	141	1
	CG+GG	171	100	1.00(0.74, 1.37)		247	137	1.02(0.79, 1.33)		66	37	0.95(0.58, 1.57)		101	49	0.88(0.58, 1.33)		105	63	1.01(0.68, 1.51)		146	88	1.12(0.80, 1.57)		78	46	1.03(0.65, 1.61)		106	60	1.11(0.75, 1.65)		93	54	0.97(0.64, 1.49)		141	77	0.96(0.67, 1.36)
recessive model	CG+CC	480	271	1		703	371	1		203	111	1		303	156	1		277	160	1		400	215	1		226	127	1		323	168	1		254	144	1		380	203	1
	GG	12	15	2.13(0.97, 4.65)		18	23	2.47(1.31, 4.66)		3	4	2.30(0.49, 10.80)		6	7	2.55(0.82, 7.91)		9	11	2.11(0.85, 5.29)		12	16	2.53(1.17, 5.48)		3	6	3.50(0.85, 14.33)		7	8	2.24(0.79, 6.34)		9	9	1.72(0.65, 4.55)		11	15	2.61(1.17, 5.85)
CDH23_rs10762480								1								1								1								1								1
additive model	CC/CT/TT	360/122/10	192/87/7	1.28(0.96, 1.71)		527/179/15	275/111/8	1.13(0.89, 1.45)		142/58/6	81/30/4	0.99(0.64, 1.54)		220/81/8	121/38/4	0.88(0.60, 1.30)		218/64/4	111/57/3	1.57(1.07, 2.32)		307/98/7	154/73/4	1.36(0.98, 1.87)		159/63/7	91/39/3	1.02(0.68, 1.54)		233/89/8	124/48/4	1.00(0.70, 1.42)		201/59/3	101/48/4	1.60(1.06, 2.41)		294/90/7	151/63/4	1.27(0.91, 1.78)
co-dominant model	CC	360	192	1		527	275	1		142	81	1		220	121	1		218	111	1		307	154	1		159	91	1		233	124	1		201	101	1		294	151	1
	CT	122	87	1.32(0.95, 1.84)		179	111	1.17(0.88, 1.54)		58	30	0.86(0.51, 1.47)		81	38	0.81(0.52, 1.27)		64	57	1.74(1.13, 2.68)		98	73	1.47(1.03, 2.11)		63	39	1.09(0.68, 1.77)		89	48	1.00(0.66, 1.51)		59	48	1.51(0.95, 2.40)		90	63	1.31(0.90, 1.92)
	TT	10	7	1.42(0.52, 3.82)		15	8	1.09(0.46, 2.63)		6	4	1.62(0.43, 6.20)		8	4	1.13(0.32, 3.91)		4	3	1.19(0.25, 5.53)		7	4	1.10(0.31, 3.86)		7	3	0.79(0.20, 3.15)		8	4	0.98(0.29, 3.33)		3	4	3.57(0.75, 16.99)		7	4	1.32(0.37, 4.68)
dominant model	CC	360	192	1		527	275	1		142	81	1		220	121	1		218	111	1		307	154	1		159	91	1		233	124	1		201	101	1		294	151	1
	CT+TT	132	94	1.33(0.97, 1.83)		194	119	1.16(0.89, 1.53)		64	34	0.92(0.55, 1.53)		89	42	0.84(0.54, 1.29)		68	60	1.71(1.12, 2.60)		105	77	1.45(1.02, 2.06)		70	42	1.06(0.67, 1.69)		97	52	1.00(0.67, 1.49)		62	52	1.59(1.01, 2.51)		97	67	1.31(0.90, 1.90)
recessive model	CT+CC	482	279	1		706	386	1		200	111	1		301	159	1		282	168	1		405	227	1		222	130	1		322	172	1		260	149	1		384	214	1
	TT	10	7	1.31(0.49, 3.52)		15	8	1.05(0.44, 2.52)		6	4	1.69(0.44, 6.39)		8	4	1.18(0.34, 4.08)		4	3	1.01(0.22, 4.70)		7	4	0.98(0.28, 3.44)		7	3	0.77(0.19, 3.05)		8	4	0.98(0.29, 3.32)		3	4	3.20(0.67, 15.22)		7	4	1.23(0.35, 4.36)
CDH23_rs10466026								1								1								1								1								1
additive model	GG/GA/AA	133/255/101	79/134/69	1.07(0.87, 1.33)		198/373/147	117/182/91	1.01(0.85, 1.21)		40/121/44	29/60/25	0.94(0.66, 1.35)		72/173/63	44/82/36	0.98(0.74, 1.30)		93/134/57	50/74/44	1.17(0.90, 1.53)		126/200/84	73/100/55	1.04(0.83, 1.30)		63/116/50	37/63/32	1.06(0.78, 1.43)		95/162/73	52/80/43	1.03(0.80, 1.34)		70/139/51	42/71/37	1.10(0.82, 1.48)		103/211/74	65/102/48	1.00(0.78, 1.27)
co-dominant model	GG	133	79	1		198	117	1		40	29	1		72	44	1		93	50	1		126	73	1		63	37	1		95	52	1		70	42	1		103	65	1
	GA	255	134	0.90(0.63, 1.28)		373	182	0.82(0.62, 1.10)		121	60	0.72(0.40, 1.28)		173	82	0.77(0.49, 1.23)		134	74	1.04(0.66, 1.63)		200	100	0.86(0.59, 1.26)		116	63	0.94(0.56, 1.57)		162	80	0.90(0.58, 1.38)		139	71	0.86(0.53, 1.41)		211	102	0.77(0.52, 1.14)
	AA	101	69	1.17(0.77, 1.78)		147	91	1.06(0.75, 1.50)		44	25	0.89(0.44, 1.81)		63	36	0.98(0.56, 1.73)		57	44	1.40(0.82, 2.37)		84	55	1.12(0.71, 1.75)		50	32	1.13(0.61, 2.07)		73	43	1.09(0.65, 1.81)		51	37	1.25(0.69, 2.24)		74	48	1.04(0.64, 1.68)
dominant model	GG	133	79	1		198	117	1		40	29	1		72	44	1		93	50	1		126	73	1		63	37	1		95	52	1		70	42	1		103	65	1
	GA+AA	356	203	0.98(0.70, 1.36)		520	273	0.89(0.68, 1.17)		165	85	0.76(0.44, 1.33)		236	118	0.83(0.53, 1.28)		191	118	1.15(0.75, 1.74)		284	155	0.94(0.66, 1.33)		166	95	1.00(0.61, 1.61)		235	123	0.95(0.64, 1.43)		190	108	0.97(0.61, 1.53)		285	150	0.84(0.58, 1.21)
recessive model	GA+GG	388	213	1		571	299	1		161	89	1		245	126	1		227	124	1		326	173	1		179	100	1		257	132	1		209	113	1		314	167	1
	AA	101	69	1.25(0.88, 1.79)		147	91	1.19(0.89, 1.61)		44	25	1.14(0.64, 2.01)		63	36	1.17(0.73, 1.88)		57	44	1.37(0.87, 2.15)		84	55	1.22(0.82, 1.80)		50	32	1.17(0.70, 1.95)		73	43	1.16(0.75, 1.79)		51	37	1.37(0.84, 2.25)		74	48	1.23(0.81, 1.86)
CDH23_rs4747194								1								1								1								1								1
additive model	GG/GA/AA	133/257/102	80/135/71	1.07(0.87, 1.32)		198/375/148	118/183/93	1.02(0.85, 1.21)		40/121/45	29/60/26	0.95(0.67, 1.35)		72/173/64	44/82/37	0.99(0.74, 1.31)		93/136/57	51/75/45	1.17(0.90, 1.52)		126/202/84	74/101/56	1.04(0.83, 1.30)		62/117/50	37/62/34	1.08(0.80, 1.46)		94/163/73	52/79/45	1.05(0.81, 1.36)		71/140/52	43/73/37	1.08(0.80, 1.45)		104/212/75	66/104/48	0.99(0.77, 1.26)
co-dominant model	GG	133	80	1		198	118	1		40	29	1		72	44	1		93	51	1		126	74	1		62	37	1		94	52	1		71	43	1		104	66	1
	GA	257	135	0.89(0.63, 1.26)		375	183	0.82(0.61, 1.09)		121	60	0.72(0.40, 1.29)		173	82	0.77(0.49, 1.23)		136	75	1.01(0.65, 1.58)		202	101	0.85(0.58, 1.24)		117	62	0.90(0.54, 1.51)		163	79	0.87(0.56, 1.35)		140	73	0.87(0.54, 1.42)		212	104	0.77(0.52, 1.14)
	AA	102	71	1.17(0.77, 1.78)		148	93	1.06(0.75, 1.50)		45	26	0.90(0.45, 1.82)		64	37	0.99(0.57, 1.74)		57	45	1.39(0.82, 2.35)		84	56	1.12(0.71, 1.74)		50	34	1.17(0.64, 2.15)		73	45	1.12(0.68, 1.86)		52	37	1.19(0.67, 2.13)		75	48	1.01(0.63, 1.64)
dominant model	GG	133	80	1		198	118	1		40	29	1		72	44	1		93	51	1		126	74	1		62	37	1		94	52	1		71	43	1		104	66	1
	GA+AA	359	206	0.97(0.70, 1.35)		523	276	0.89(0.67, 1.16)		166	86	0.77(0.44, 1.34)		237	119	0.83(0.53, 1.29)		193	120	1.12(0.74, 1.70)		286	157	0.93(0.66, 1.32)		167	96	0.98(0.61, 1.59)		236	124	0.95(0.63, 1.42)		192	110	0.96(0.61, 1.52)		287	152	0.84(0.58, 1.21)
recessive model	GA+GG	390	215	1		573	301	1		161	89	1		245	126	1		229	126	1		328	175	1		179	99	1		257	131	1		211	116	1		316	170	1
	AA	102	71	1.27(0.89, 1.80)		148	93	1.21(0.90, 1.62)		45	26	1.15(0.65, 2.01)		64	37	1.18(0.74, 1.88)		57	45	1.38(0.88, 2.18)		84	56	1.23(0.83, 1.81)		50	34	1.25(0.76, 2.07)		73	45	1.22(0.79, 1.88)		52	37	1.30(0.80, 2.13)		75	48	1.20(0.79, 1.81)
CDH23_rs3752751								1								1								1								1								1
additive model	CC/CT/TT	168/227/93	91/139/56	1.08(0.87, 1.32)		252/324/141	137/180/77	1.00(0.84, 1.19)		70/87/49	43/57/15	0.70(0.50, 0.98)		108/130/71	61/75/27	0.82(0.63, 1.07)		98/140/44	48/82/41	1.46(1.10, 1.93)		144/194/70	76/105/50	1.16(0.92, 1.45)		79/108/41	40/67/26	1.14(0.84, 1.55)		117/151/61	59/83/34	1.05(0.81, 1.36)		89/119/52	51/72/30	1.04(0.78, 1.39)		135/173/80	78/97/43	0.97(0.77, 1.22)
co-dominant model	CC	168	91	1		252	137	1		70	43	1		108	61	1		98	48	1		144	76	1		79	40	1		117	59	1		89	51	1		135	78	1
	CT	227	139	1.14(0.82, 1.60)		324	180	1.01(0.76, 1.33)		87	57	0.98(0.58, 1.65)		130	75	0.98(0.64, 1.51)		140	82	1.27(0.81, 1.98)		194	105	1.02(0.71, 1.48)		108	67	1.22(0.74, 1.99)		151	83	1.07(0.71, 1.62)		119	72	1.07(0.67, 1.71)		173	97	0.96(0.66, 1.40)
	TT	93	56	1.14(0.75, 1.74)		141	77	1.00(0.70, 1.41)		49	15	0.43(0.21, 0.87)		71	27	0.63(0.36, 1.10)		44	41	2.20(1.24, 3.88)		70	50	1.39(0.88, 2.20)		41	26	1.27(0.68, 2.37)		61	34	1.1(0.65, 1.86)		52	30	1.08(0.60, 1.93)		80	43	0.93(0.58, 1.49)
dominant model	CC	168	91	1		252	137	1		70	43	1		108	61	1		98	48	1		144	76	1		79	40	1		117	59	1		89	51	1		135	78	1
	CT+TT	320	195	1.14(0.83, 1.57)		465	257	1.00(0.78, 1.30)		136	72	0.78(0.48, 1.28)		201	102	0.86(0.58, 1.28)		184	123	1.47(0.96, 2.24)		264	155	1.12(0.79, 1.58)		149	93	1.23(0.77, 1.96)		212	117	1.08(0.73, 1.59)		171	102	1.08(0.70, 1.66)		253	140	0.95(0.67, 1.35)
recessive model	CT+CC	395	230	1		576	317	1		157	100	1		238	136	1		238	130	1		338	181	1		187	107	1		268	142	1		208	123	1		308	175	1
	TT	93	56	1.05(0.72, 1.53)		141	77	0.99(0.73, 1.36)		49	15	0.43(0.23, 0.82)		71	27	0.64(0.39, 1.05)		44	41	1.90(1.16, 3.10)		70	50	1.37(0.91, 2.07)		41	26	1.13(0.65, 1.96)		61	34	1.06(0.66, 1.70)		52	30	1.04(0.62, 1.73)		80	43	0.96(0.63, 1.45)
CDH23_rs3802720								1								1								1								1								1
additive model	CC/CT/TT	295/181/16	168/103/15	1.13(0.87, 1.46)		441/255/25	239/138/17	1.05(0.85, 1.31)		121/78/7	62/48/5	1.25(0.83, 1.89)		185/113/11	90/67/6	1.19(0.85, 1.67)		174/103/9	106/55/10	1.07(0.77, 1.50)		256/142/14	149/71/11	0.98(0.74, 1.31)		142/78/9	73/55/5	1.24(0.86, 1.81)		209/109/12	103/68/5	1.13(0.82, 1.57)		153/103/7	95/48/10	1.07(0.75, 1.53)		232/146/13	136/70/12	1.00(0.75, 1.34)
co-dominant model	CC	295	168	1		441	239	1		121	62	1		185	90	1		174	106	1		256	149	1		142	73	1		209	103	1		153	95	1		232	136	1
	CT	181	103	1.03(0.76, 1.41)		255	138	1.01(0.78, 1.31)		78	48	1.28(0.79, 2.08)		113	67	1.25(0.84, 1.87)		103	55	0.90(0.59, 1.36)		142	71	0.87(0.61, 1.24)		78	55	1.40(0.89, 2.20)		109	68	1.26(0.86, 1.86)		103	48	0.82(0.53, 1.27)		146	70	0.84(0.59, 1.20)
	TT	16	15	1.68(0.80, 3.50)		25	17	1.28(0.68, 2.44)		7	5	1.45(0.42, 4.99)		11	6	1.18(0.41, 3.34)		9	10	1.90(0.74, 4.89)		14	11	1.38(0.61, 3.14)		9	5	1.06(0.34, 3.30)		12	5	0.84(0.29, 2.46)		7	10	2.51(0.90, 7.02)		13	12	1.67(0.73, 3.81)
dominant model	CC	295	168	1		441	239	1		121	62	1		185	90	1		174	106	1		256	149	1		142	73	1		209	103	1		153	95	1		232	136	1
	CT+TT	197	118	1.09(0.80, 1.46)		280	155	1.03(0.80, 1.33)		85	53	1.29(0.80, 2.08)		124	73	1.25(0.84, 1.84)		112	65	0.98(0.66, 1.45)		156	82	0.92(0.66, 1.28)		87	60	1.36(0.88, 2.11)		121	73	1.22(0.84, 1.78)		110	58	0.93(0.61, 1.41)		159	82	0.91(0.64, 1.28)
recessive model	CT+CC	476	271	1		696	377	1		199	110	1		298	157	1		277	161	1		398	220	1		220	128	1		318	171	1		256	143	1		378	206	1
	TT	16	15	1.66(0.80, 3.43)		25	17	1.28(0.68, 2.41)		7	5	1.30(0.39, 4.39)		11	6	1.07(0.38, 3.01)		9	10	1.97(0.77, 5.02)		14	11	1.45(0.65, 3.26)		9	5	0.93(0.31, 2.85)		12	5	0.77(0.27, 2.24)		7	10	2.71(0.98, 7.48)		13	12	1.78(0.79, 4.02)
CDH23_rs17712523								1								1								1								1								1
additive model	GG/GA/AA	352/128/12	209/68/9	0.99(0.74, 1.31)		522/185/14	290/92/12	1.01(0.79, 1.29)		152/49/5	88/24/3	0.86(0.53, 1.38)		232/72/5	123/37/3	0.99(0.66, 1.49)		200/79/7	121/44/6	1.08(0.75, 1.55)		290/113/9	167/55/9	1.02(0.75, 1.39)		159/67/3	100/30/3	0.82(0.52, 1.28)		230/96/4	132/41/3	0.83(0.56, 1.23)		193/61/9	109/38/6	1.14(0.78, 1.67)		292/89/10	158/51/9	1.16(0.84, 1.60)
co-dominant model	GG	352	209	1		522	290	1		152	88	1		232	123	1		200	121	1		290	167	1		159	100	1		230	132	1		193	109	1		292	158	1
	GA	128	68	0.91(0.64, 1.28)		185	92	0.90(0.68, 1.21)		49	24	0.83(0.46, 1.47)		72	37	0.99(0.62, 1.58)		79	44	0.98(0.63, 1.52)		113	55	0.86(0.59, 1.25)		67	30	0.70(0.42, 1.16)		96	41	0.75(0.49, 1.16)		61	38	1.16(0.71, 1.88)		89	51	1.07(0.71, 1.60)
	AA	12	9	1.30(0.54, 3.17)		14	12	1.59(0.72, 3.51)		5	3	0.85(0.19, 3.75)		5	3	0.99(0.23, 4.30)		7	6	1.62(0.53, 4.99)		9	9	1.90(0.73, 4.93)		3	3	1.75(0.34, 9.03)		4	3	1.51(0.32, 7.10)		9	6	1.24(0.42, 3.64)		10	9	1.70(0.67, 4.32)
dominant model	GG	352	209	1		522	290	1		152	88	1		232	123	1		200	121	1		290	167	1		159	100	1		230	132	1		193	109	1		292	158	1
	GA+AA	140	77	0.94(0.68, 1.31)		199	104	0.95(0.72, 1.26)		54	27	0.83(0.48, 1.44)		77	40	0.99(0.63, 1.56)		86	50	1.03(0.68, 1.57)		122	64	0.93(0.65, 1.34)		70	33	0.74(0.46, 1.21)		100	44	0.78(0.51, 1.19)		70	44	1.17(0.74, 1.85)		99	60	1.13(0.77, 1.66)
recessive model	GA+GG	480	277	1		707	382	1		201	112	1		304	160	1		279	165	1		403	222	1		226	130	1		326	173	1		254	147	1		381	209	1
	AA	12	9	1.34(0.55, 3.24)		14	12	1.63(0.74, 3.59)		5	3	0.88(0.20, 3.88)		5	3	0.99(0.23, 4.29)		7	6	1.63(0.53, 4.98)		9	9	1.98(0.77, 5.12)		3	3	1.92(0.37, 9.88)		4	3	1.64(0.35, 7.66)		9	6	1.19(0.41, 3.48)		10	9	1.67(0.66, 4.23)
CDH23_rs3752752								1								1								1								1								1
additive model	CC/CT/TT	168/229/91	92/138/53	1.05(0.86, 1.30)		253/326/138	139/178/74	0.99(0.83, 1.17)		71/85/48	43/57/14	0.70(0.50, 0.99)		108/129/70	62/74/26	0.81(0.62, 1.06)		97/144/43	49/81/39	1.40(1.06, 1.87)		145/197/68	77/104/48	1.14(0.91, 1.44)		80/109/40	42/66/24	1.08(0.80, 1.48)		119/151/60	61/82/32	1.02(0.79, 1.32)		88/120/51	50/72/29	1.04(0.78, 1.39)		134/175/78	78/96/42	0.96(0.76, 1.21)
co-dominant model	CC	168	92	1		253	139	1		71	43	1		108	62	1		97	49	1		145	77	1		80	42	1		119	61	1		88	50	1		134	78	1
	CT	229	138	1.12(0.80, 1.56)		326	178	0.98(0.74, 1.29)		85	57	1.03(0.61, 1.73)		129	74	0.97(0.63, 1.49)		144	81	1.19(0.76, 1.86)		197	104	0.99(0.69, 1.43)		109	66	1.15(0.70, 1.87)		151	82	1.04(0.69, 1.57)		120	72	1.08(0.70, 1.73)		175	96	0.93(0.64, 1.36)
	TT	91	53	1.09(0.71, 1.67)		138	74	0.97(0.68, 1.38)		48	14	0.41(0.20, 0.86)		70	26	0.61(0.35, 1.07)		43	39	2.06(1.16, 3.66)		68	48	1.36(0.86, 2.17)		40	24	1.15(0.61, 2.17)		60	32	1.04(0.61, 1.76)		51	29	1.08(0.60, 1.94)		78	42	0.93(0.58, 1.49)
dominant model	CC	168	92	1		253	139	1		71	43	1		108	62	1		97	49	1		145	77	1		80	42	1		119	61	1		88	50	1		134	78	1
	CT+TT	320	191	1.11(0.81, 1.52)		464	252	0.98(0.75, 1.27)		133	71	0.80(0.49, 1.32)		199	100	0.84(0.56, 1.26)		187	120	1.38(0.90, 2.10)		265	152	1.09(0.77, 1.53)		149	90	1.15(0.73, 1.82)		211	114	1.04(0.71, 1.53)		171	101	1.08(0.70, 1.68)		253	138	0.93(0.66, 1.32)
recessive model	CT+CC	397	230	1		579	317	1		156	100	1		237	136	1		241	130	1		342	181	1		189	108	1		270	143	1		208	122	1		309	174	1
	TT	91	53	1.02(0.70, 1.49)		138	74	0.98(0.72, 1.35)		48	14	0.41(0.21, 0.79)		70	26	0.62(0.38, 1.03)		43	39	1.85(1.12, 3.04)		68	48	1.37(0.91, 2.08)		40	24	1.06(0.61, 1.87)		60	32	1.01(0.63, 1.63)		51	29	1.03(0.61, 1.72)		78	42	0.96(0.63, 1.47)
CDH23_rs7087735								1								1								1								1								1
additive model	TT/TC/CC	153/243/94	101/138/45	0.86(0.70, 1.07)		220/363/136	128/189/75	0.97(0.81, 1.16)		69/97/40	38/56/20	0.94(0.67, 1.30)		94/155/60	52/77/33	0.98(0.75, 1.29)		84/146/54	63/82/25	0.81(0.61, 1.07)		126/208/76	76/112/42	0.96(0.76, 1.22)		75/109/45	46/66/20	0.87(0.64, 1.18)		107/158/65	55/87/33	1.01(0.78, 1.31)		78/134/49	55/72/25	0.86(0.64, 1.16)		113/205/71	73/102/42	0.94(0.74, 1.20)
co-dominant model	TT	153	101	1		220	128	1		69	38	1		94	52	1		84	63	1		126	76	1		75	46	1		107	55	1		78	55	1		113	73	1
	TC	243	138	0.86(0.62, 1.19)		363	189	0.89(0.67, 1.18)		97	56	1.01(0.59, 1.71)		155	77	0.87(0.56, 1.35)		146	82	0.78(0.50, 1.19)		208	112	0.91(0.63, 1.31)		109	66	0.98(0.61, 1.58)		158	87	1.08(0.71, 1.65)		134	72	0.75(0.47, 1.18)		205	102	0.75(0.51, 1.10)
	CC	94	45	0.75(0.48, 1.16)		136	75	0.97(0.67, 1.38)		40	20	0.86(0.43, 1.69)		60	33	0.99(0.57, 1.71)		54	25	0.66(0.37, 1.18)		76	42	0.95(0.59, 1.52)		45	20	0.72(0.38, 1.37)		65	33	1.00(0.59, 1.70)		49	25	0.78(0.43, 1.44)		71	42	0.94(0.58, 1.53)
dominant model	TT	153	101	1		220	128	1		69	38	1		94	52	1		84	63	1		126	76	1		75	46	1		107	55	1		78	55	1		113	73	1
	TC+CC	337	183	0.83(0.60, 1.13)		499	264	0.91(0.70, 1.19)		137	76	0.96(0.58, 1.58)		215	110	0.90(0.60, 1.36)		200	107	0.75(0.50, 1.12)		284	154	0.92(0.65, 1.30)		154	86	0.90(0.57, 1.42)		223	120	1.06(0.71, 1.57)		183	97	0.76(0.49, 1.17)		276	144	0.80(0.56, 1.15)
recessive model	TC+TT	396	239	1		583	317	1		166	94	1		249	129	1		230	145	1		334	188	1		184	112	1		265	142	1		212	127	1		318	175	1
	CC	94	45	0.82(0.55, 1.21)		136	75	1.03(0.75, 1.42)		40	20	0.85(0.47, 1.56)		60	33	1.08(0.67, 1.75)		54	25	0.77(0.46, 1.30)		76	42	1.00(0.66, 1.52)		45	20	0.73(0.41, 1.30)		65	33	0.95(0.60, 1.52)		49	25	0.93(0.54, 1.61)		71	42	1.12(0.73, 1.72)
CDH23_rs3747867								1								1								1								1								1
additive model	CC/CT/TT	335/139/7	181/90/6	1.24(0.93, 1.66)		500/197/13	267/111/7	1.05(0.82, 1.34)		135/59/5	78/32/3	0.94(0.59, 1.48)		213/82/7	118/40/3	0.86(0.58, 1.27)		200/80/2	103/58/3	1.48(1.00, 2.18)		287/115/6	149/71/4	1.18(0.86, 1.63)		148/72/5	90/36/4	0.93(0.61, 1.41)		222/98/6	124/44/5	0.91(0.63, 1.31)		187/67/2	91/54/2	1.63(1.07, 2.48)		278/99/7	143/67/2	1.18(0.84, 1.65)
co-dominant model	CC	335	181	1		500	267	1		135	78	1		213	118	1		200	103	1		287	149	1		148	90	1		222	124	1		187	91	1		278	143	1
	CT	139	90	1.21(0.88, 1.68)		197	111	1.05(0.79, 1.38)		59	32	0.85(0.50, 1.45)		82	40	0.83(0.53, 1.29)		80	58	1.46(0.96, 2.22)		115	71	1.20(0.84, 1.72)		72	36	0.84(0.52, 1.36)		98	44	0.81(0.53, 1.23)		67	54	1.61(1.03, 2.53)		99	67	1.28(0.88, 1.87)
	TT	7	6	1.75(0.57, 5.37)		13	7	1.09(0.43, 2.80)		5	3	1.35(0.30, 6.10)		7	3	0.93(0.23, 3.74)		2	3	2.48(0.40, 15.46)		6	4	1.26(0.35, 4.57)		5	4	1.34(0.35, 5.14)		6	5	1.49(0.44, 5.02)		2	2	2.95(0.39, 22.55)		7	2	0.65(0.13, 3.25)
dominant model	CC	335	181	1		500	267	1		135	78	1		213	118	1		200	103	1		287	149	1		148	90	1		222	124	1		187	91	1		278	143	1
	CT+TT	146	96	1.24(0.90, 1.70)		210	118	1.05(0.80, 1.38)		64	35	0.89(0.53, 1.48)		89	43	0.83(0.54, 1.28)		82	61	1.49(0.98, 2.25)		121	75	1.20(0.85, 1.71)		77	40	0.87(0.55, 1.39)		104	49	0.85(0.56, 1.27)		69	56	1.64(1.05, 2.57)		106	69	1.25(0.86, 1.80)
recessive model	CT+CC	474	271	1		697	378	1		194	110	1		295	158	1		280	161	1		402	220	1		220	126	1		320	168	1		254	145	1		377	210	1
	TT	7	6	1.65(0.54, 5.03)		13	7	1.08(0.42, 2.75)		5	3	1.41(0.31, 6.31)		7	3	0.97(0.24, 3.89)		2	3	2.22(0.36, 13.71)		6	4	1.19(0.33, 4.32)		5	4	1.41(0.37, 5.39)		6	5	1.59(0.47, 5.30)		2	2	2.54(0.33, 19.40)		7	2	0.61(0.12, 3.04)
CDH23_rs4747195								1								1								1								1								1
additive model	CC/CT/TT	133/256/100	80/135/71	1.08(0.88, 1.34)		198/374/146	118/183/93	1.02(0.86, 1.22)		40/122/44	29/60/26	0.96(0.67, 1.37)		72/174/63	44/82/37	0.99(0.75, 1.32)		93/134/56	51/75/45	1.17(0.90, 1.53)		126/200/83	74/101/56	1.04(0.83, 1.31)		62/116/50	37/62/34	1.08(0.79, 1.46)		94/162/73	52/79/45	1.05(0.81, 1.35)		71/140/50	43/73/37	1.10(0.82, 1.47)		104/212/73	66/104/48	1.00(0.78, 1.27)
co-dominant model	CC	133	80	1		198	118	1		40	29	1		72	44	1		93	51	1		126	74	1		62	37	1		94	52	1		71	43	1		104	66	1
	CT	256	135	0.89(0.63, 1.26)		374	183	0.82(0.61, 1.09)		122	60	0.71(0.40, 1.28)		174	82	0.77(0.48, 1.22)		134	75	1.02(0.65, 1.60)		200	101	0.86(0.59, 1.25)		116	62	0.91(0.54, 1.52)		162	79	0.87(0.57, 1.35)		140	73	0.87(0.54, 1.42)		212	104	0.77(0.52, 1.14)
	TT	100	71	1.19(0.79, 1.81)		146	93	1.07(0.76, 1.52)		44	26	0.93(0.46, 1.88)		63	37	1.01(0.58, 1.77)		56	45	1.41(0.83, 2.38)		83	56	1.13(0.72, 1.76)		50	34	1.17(0.64, 2.14)		73	45	1.12(0.67, 1.86)		50	37	1.24(0.69, 2.23)		73	48	1.04(0.64, 1.68)
dominant model	CC	133	80	1		198	118	1		40	29	1		72	44	1		93	51	1		126	74	1		62	37	1		94	52	1		71	43	1		104	66	1
	CT+TT	356	206	0.98(0.70, 1.36)		520	276	0.89(0.68, 1.17)		166	86	0.77(0.44, 1.34)		237	119	0.83(0.53, 1.29)		190	120	1.14(0.75, 1.72)		283	157	0.94(0.66, 1.33)		166	96	0.99(0.61, 1.60)		235	124	0.95(0.63, 1.42)		190	110	0.97(0.62, 1.53)		285	152	0.84(0.58, 1.22)
recessive model	CT+CC	389	215	1		572	301	1		162	89	1		246	126	1		227	126	1		326	175	1		178	99	1		256	131	1		211	116	1		316	170	1
	TT	100	71	1.29(0.91, 1.83)		146	93	1.22(0.91, 1.64)		44	26	1.19(0.68, 2.09)		63	37	1.21(0.76, 1.93)		56	45	1.39(0.88, 2.19)		83	56	1.23(0.84, 1.82)		50	34	1.25(0.75, 2.06)		73	45	1.22(0.79, 1.87)		50	37	1.36(0.83, 2.23)		73	48	1.23(0.81, 1.85)
CDH23_rs1227065
additive model	GG/GA/AA	360/116/3	218/58/2	0.82(0.58, 1.16)		/				148/50/3	90/22/1	0.69(0.40, 1.18)		/				212/66/0	128/36/1	0.94(0.60, 1.48)		/				169/54/3	108/21/1	0.63(0.37, 1.06)		/				191/62/0	110/37/1	1.04(0.65, 1.67)		/
co-dominant model	GG	360	218	1						148	90	1						212	128	1						169	108	1						191	110	1
	GA	116	58	0.79(0.55, 1.14)						50	22	0.67(0.37, 1.20)						66	36	0.87(0.55, 1.40)						54	21	0.60(0.34, 1.06)						62	37	0.99(0.61, 1.60)
	AA	3	2	1.22(0.20, 7.59)						3	1	0.62(0.06, 6.44)						0	1	/						3	1	0.59(0.06, 5.83)						0	1	/
dominant model	GG	360	218	1						148	90	1						212	128	1						169	108	1						191	110	1
	GA+AA	119	60	0.80(0.56, 1.15)						53	23	0.67(0.38, 1.19)						66	37	0.90(0.57, 1.44)						57	22	0.60(0.35, 1.05)						62	38	1.01(0.63, 1.63)
recessive model	GA+GG	476	276	1						198	112	1						278	164	1						223	129	1						253	147	1
	AA	3	2	1.29(0.21, 7.99)						3	1	0.68(0.07, 7.02)						0	1	/						3	1	0.65(0.07, 6.39)						0	1	/
CDH23_rs10823829
additive model	TT/TC/CC	263/202/24	154/114/18	1.05(0.82, 1.34)		/				119/78/9	67/41/7	1.05(0.70, 1.55)		/				144/124/15	87/73/11	1.02(0.74, 1.41)		/				123/88/17	69/54/10	1.04(0.74, 1.47)		/				140/114/7	85/60/8	1.06(0.74, 1.52)		/
co-dominant model	TT	263	154	1						119	67	1						144	87	1						123	69	1						140	85	1
	TC	202	114	0.98(0.72, 1.33)						78	41	0.92(0.56, 1.50)						124	73	0.99(0.66, 1.47)						88	54	1.09(0.70, 1.71)						114	60	0.90(0.59, 1.38)
	CC	24	18	1.30(0.68, 2.50)						9	7	1.51(0.52, 4.33)						15	11	1.13(0.49, 2.62)						17	10	1.02(0.44, 2.35)						7	8	2.02(0.69, 5.91)
dominant model	TT	263	154	1						119	67	1						144	87	1						123	69	1						140	85	1
	TC+CC	226	132	1.02(0.76, 1.36)						87	48	0.97(0.61, 1.56)						139	84	1.00(0.68, 1.47)						105	64	1.08(0.70, 1.66)						121	68	0.96(0.64, 1.46)
recessive model	TC+TT	465	268	1						197	108	1						268	160	1						211	123	1						254	145	1
	CC	24	18	1.31(0.69, 2.48)						9	7	1.56(0.55, 4.40)						15	11	1.14(0.50, 2.58)						17	10	0.98(0.43, 2.22)						7	8	2.11(0.73, 6.09)
Note: CNE: cumulative noise exposure; BP: blood pressure; OR: odds ratio; CI: confidence interval; OR(95%CI)#:Adjusted for CNE, smoking, drinking, exercise and BP.
